# Supplementary material for: Dissipation enhancement effect from titania semiconductor modulation of graphene-based electromagnetic absorbing composites
Source: Royal Society of Chemistry journal article supplement (doi:10.1039/d0ra08557j), 2020-01-01
Supplement: d0ra08557j1.pdf [file d0ra08557j1.pdf]

## Supplementary Information

### Dissipation Enhancement Effect from Titania Semiconductor Modulation of Graphene-based Electromagnetic Absorbing Composites

Yi Lixi\*      Wu Jinwu

School of Aircraft Engineering, Nanchang Hangkong University, Nanchang 330063, China

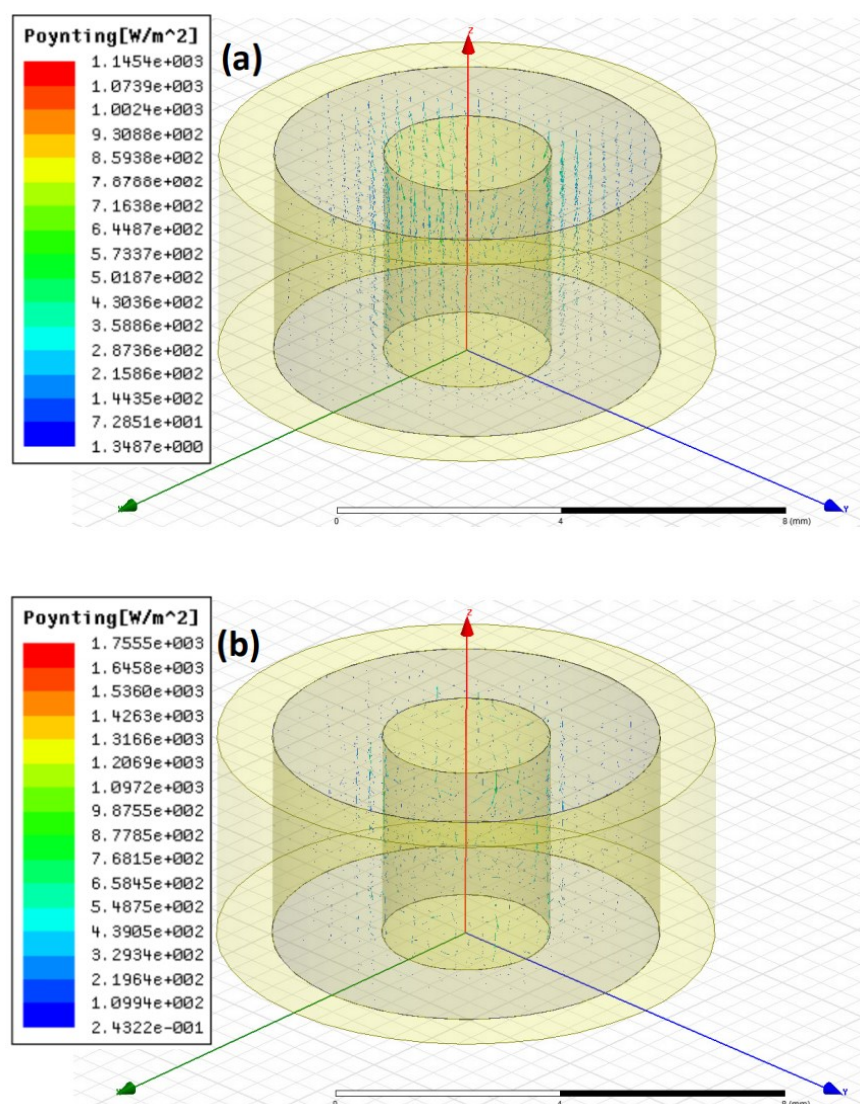

---

\* Corresponding author.  
E-mail address: yilixi@nchu.edu.cn.

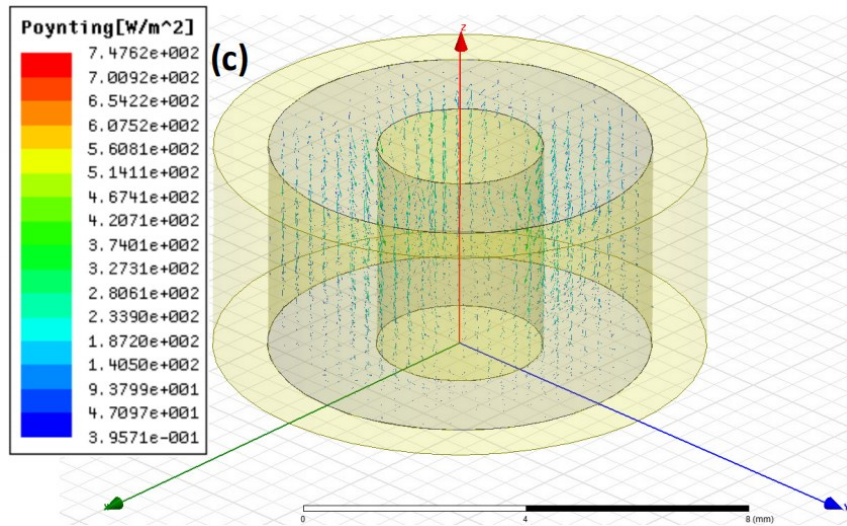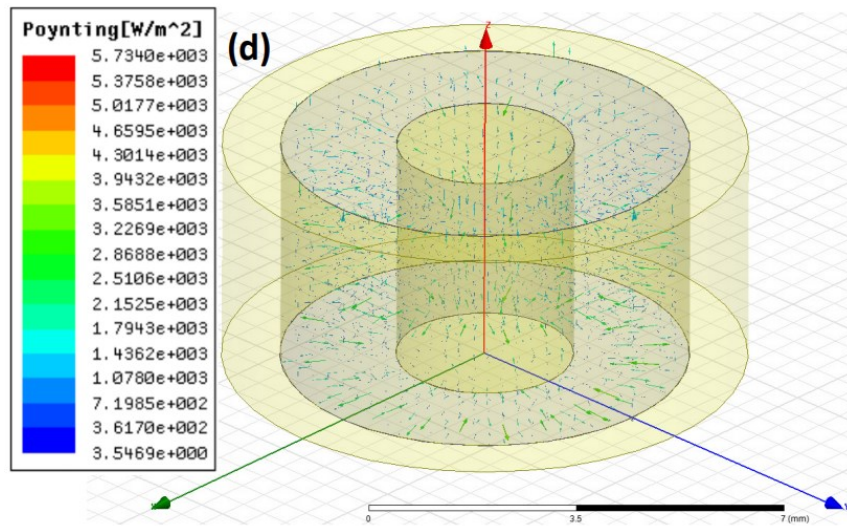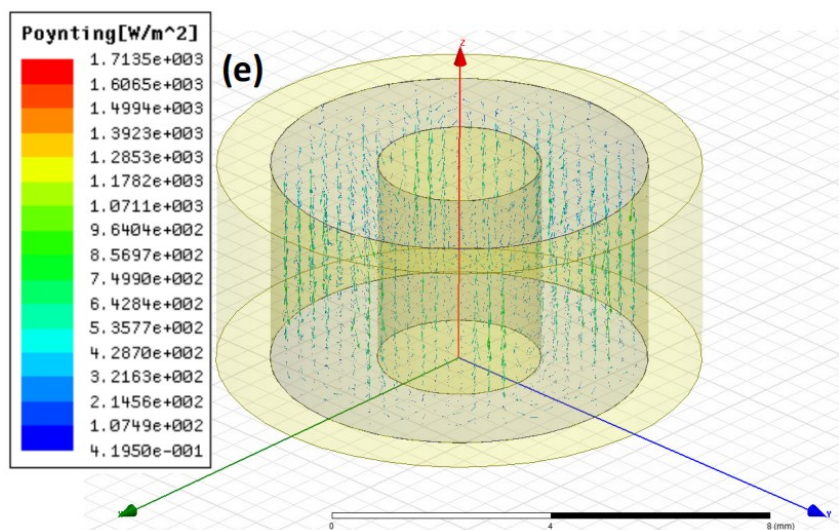

Figure S1 Energy flux density of electromagnetic wave in absorber. (a)GM (Exfoliated GNS and manganese oxides 1:1), (b) GMT10, (c)GMT30, (d)GMT50, and (e) GT composite samples. See online version for color display.

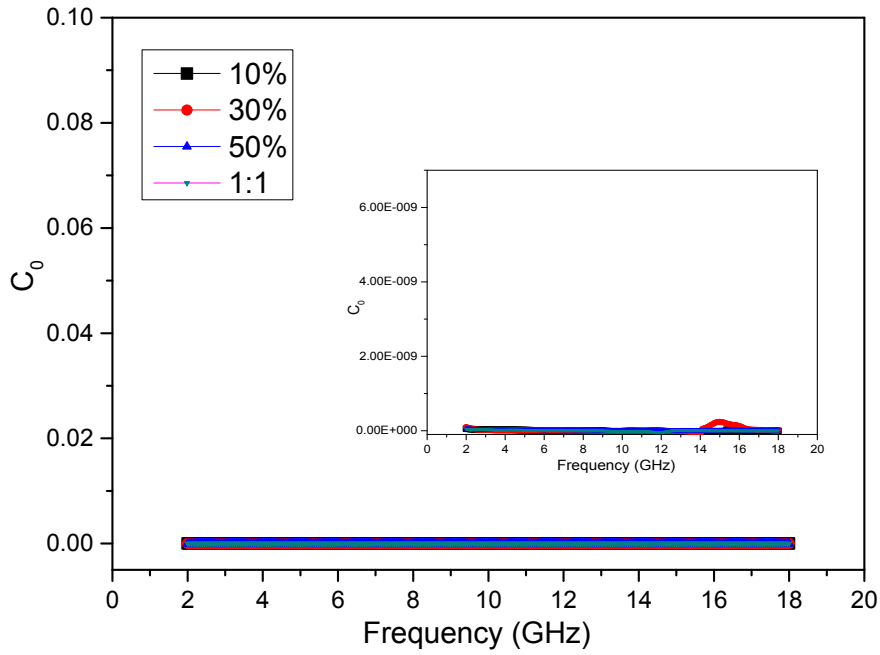

Figure S2 Eddy current coefficient  $C_0$  of composite samples with addition of titania. To display different sample curves as much as possible, the symbols are set in different sizes. The inset figure with a scale in very small magnitude of E-9 to E-10 shows some differences in high resolution. Though there are tiny waves in the high frequency end for  $C_0$ , which are almost constant in the main range.

Table S1 Increment of semiconductor titania introduction to electromagnetic type composites

| Thickness<br>4mm<br>Modulation<br>components | EM component           |                      |                               |                                  |                                            |           |
|----------------------------------------------|------------------------|----------------------|-------------------------------|----------------------------------|--------------------------------------------|-----------|
|                                              | Reflection<br>loss(dB) | Magnetic<br>graphene | Magnetic<br>graphene<br>@PANI | ZnFe <sub>2</sub> O <sub>4</sub> | ZnFe <sub>2</sub> O <sub>4</sub> @graphene | GNS-EMO   |
| Before titania introduction                  |                        | ~20(HF)              | ~18(LF)                       | ~4.25                            | ~13.65(LF) 8.5(HF)                         | 4.78(HF)  |
| @TiO <sub>2</sub>                            |                        | ~25(HF)              | ~9(LF)                        | —                                | ~31(LF) 12.5(HF)                           | 9.91(HF)  |
| Loss increment(dB)                           |                        | 5(HF)                | -9 (LF)                       | —                                | 17.35(LF) 4.5(HF)                          | 5.13(HF)  |
| Ref.                                         |                        |                      | [28]                          |                                  | [32]                                       | This work |

HF and LH refer to high frequency and low frequency end, respectively.
